# Supplementary material for: Assessment of Non-Invasive Measurements of Oxygen Saturation and Heart Rate with an Apple Smartwatch: Comparison with a Standard Pulse Oximeter
Source: MDPI journal article supplement (doi:10.3390/jcm11061467), 2022-03-08
Supplement: s1 [file s1]

## Supplemental file S2

### Sup Table S1

SpO<sub>2</sub> Correlation between the smartwatch and the standard commercial device in different subgroups

|               | Healthy subjects | Lung Disease | CV Disease |
|---------------|------------------|--------------|------------|
| <b>r</b>      | 0.91             | 0.93         | 0.86       |
| <b>95% CI</b> | 0.85-0.93        | 0.87-0.95    | 0.81-0.89  |
| <b>P</b>      | <0.0001          | <0.0001      | <0.0001    |

### Sup Table S2

SpO<sub>2</sub> Concordance between the smartwatch and the standard commercial device in difference subgroups

|                   | Healthy subjects | Lung Disease | CV Disease |
|-------------------|------------------|--------------|------------|
| <b>bias</b>       | -0.84            | -0.86        | -0.41      |
| <b>SD of bias</b> | 1.51             | 1.55         | 1.58       |
| <b>95% CI</b>     | -3.6–2.3         | -3.8-2.2     | -3.5-2.7   |

### Sup Table S3

HR Correlation between the smartwatch and the standard commercial device in different subgroups

|               | Healthy subjects | Lung Disease | CV Disease |
|---------------|------------------|--------------|------------|
| <b>r</b>      | 0.98             | 0.99         | 0.98       |
| <b>95% CI</b> | 0.97-0.99        | 0.99-0.99    | 0.97-0.99  |
| <b>P</b>      | <0.0001          | <0.0001      | <0.0001    |

### Sup Table S4

HR Concordance between the smartwatch and the standard commercial device in difference subgroups

|                   | Healthy subjects | Lung Disease | CV Disease |
|-------------------|------------------|--------------|------------|
| <b>bias</b>       | -0.15            | -0.38        | -0.11      |
| <b>SD of bias</b> | 2.3              | 1.53         | 2.5        |
| <b>95% CI</b>     | -4.9–4.7         | -3.4-2.6     | -5-4.8     |
