# Supplementary material for: Assessment of Non-Invasive Measurements of Oxygen Saturation and Heart Rate with an Apple Smartwatch: Comparison with a Standard Pulse Oximeter
Source: MDPI journal article supplement (doi:10.3390/jcm11061467), 2022-03-08
Supplement: s1 [file s1]

Supplemental File Figure S1

SpO<sub>2</sub> Correlation in patients with lung disease

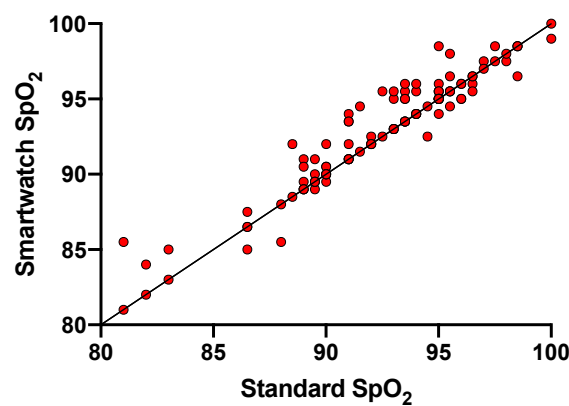

R=0.85

SpO<sub>2</sub> Correlation in patients with CV disease

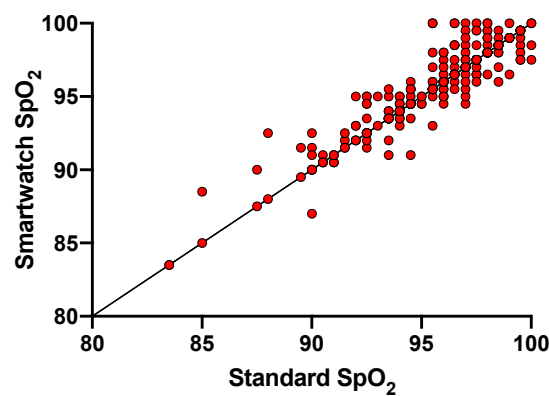

R=0.74

HR Correlation in patients with lung disease

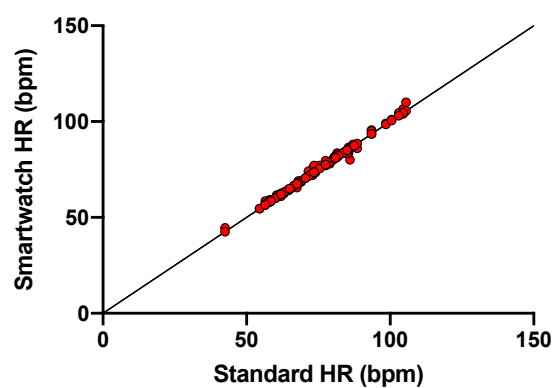

R=0.99

## HR Correlation in patients with CV disease

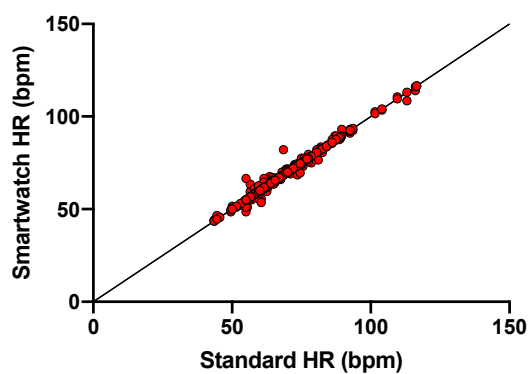

$R=0,9833$

**Figure S1.** Agreements and concordance between the standard commercial device and the smartwatch in the different subgroups.
